# Supplementary material for: Application of LpxC enzyme inhibitor to inhibit some fast-growing bacteria in human gut bacterial culturomics
Source: PubMed Central journal article supplement (PMC6937742; doi:10.1186/s12866-019-1681-6), 2019-12-30
Supplement: 12866_2019_1681_MOESM1_ESM.pdf [file 12866_2019_1681_MOESM1_ESM.pdf]

**Journal name:** *BMC Microbiology*

**Manuscript Title:** Application of LpxC enzyme inhibitor to inhibit some fast-growing bacteria in human gut bacterial culturomics

**Running title:** Application of inhibitor in gut bacterial culturomics

**Author:** Fengyi Hou<sup>1,2#</sup>, Yuxiao Chang<sup>2#</sup>, Zongyu Huang<sup>2</sup>, Ni Han<sup>2</sup>, Lei Bin<sup>2</sup>, Huimin Deng<sup>2</sup>, Zhengchao Li<sup>2</sup>, Zhiyuan Pan<sup>2</sup>, Lei Ding<sup>3</sup>, Hong Gao<sup>3</sup>, Ruifu Yang<sup>2, a</sup>, Fachao Zhi<sup>1\*</sup>, Yujing Bi<sup>2\*</sup>

<sup>1</sup> Guangdong Provincial Key Laboratory of Gastroenterology, Institute of Gastroenterology of Guangdong Province, Department of Gastroenterology, Nanfang Hospital, Southern Medical University, Guangzhou, China.

<sup>2</sup> State Key Laboratory of Pathogen and Biosecurity, Beijing Institute of Microbiology and Epidemiology, Beijing, China.

<sup>3</sup> Shijitan Hospital, Capital Medical University, Beijing, China.

<sup>#</sup>These authors contributed equally to this work.

<sup>a</sup>Senior author

\*Corresponding authors: Yujing Bi ([byj7801@sina.com](mailto:byj7801@sina.com)) and Fachao Zhi ([zhifc41532@163.com](mailto:zhifc41532@163.com))

email addresses:

Fengyi Hou: [hfy120356@163.com](mailto:hfy120356@163.com)

Yuxiao Chang: [changyuxiao3368@163.com](mailto:changyuxiao3368@163.com)

Zongyu Huang: [806057226@qq.com](mailto:806057226@qq.com)

Ni Han: [694025102@qq.com](mailto:694025102@qq.com)

Lei Bin: [624785188@qq.com](mailto:624785188@qq.com)

Huimin Deng: [tammy054@163.com](mailto:tammy054@163.com)

Zhengchao Li: 506569665@qq.com

Zhiyuan Pan: [705088752@qq.com](mailto:705088752@qq.com)

Lei Ding: dinglei1005@126.com

Hong Gao: gaohongdoctor@sina.com

Ruifu Yang: 13801034560@163.com

Fachao Zhi: zhifc41532@163.com

Yujing Bi: [byj7801@sina.com](mailto:byj7801@sina.com)

## Supplementary table & figure

**Table S1 LpxC (UDP-3-O-acyl-N-acetylglucosamine deacetylase) coding sequence.**

|                    | <b>Bacteria</b>               | <b>LpxC source</b>                     |
|--------------------|-------------------------------|----------------------------------------|
| <b>Sensitive</b>   | <i>Escherichia coli</i>       | ARTFGFMRDIEYLQSRGLCLGGSFDCAIVVDDYRVLN  |
|                    | <i>Pseudomonas aeruginosa</i> | ARTFGFMRDIEYLRSQLALGGSVENAIVVDENRVLN   |
|                    | <i>Klebsiella pneumoniae</i>  | ARTFGFMRDIEYLQSRGLCLGGSFDCAIVVDDYRVLN  |
|                    | <i>Proteus vulgaris</i>       | ARTFGFMRDIEYLQSKGLCLGGSFDCAIVVDDYRVLN  |
| <b>Insensitive</b> | <i>Bacteroides vulgatus</i>   | ARTFVVFVREIEPLLGAGLIKGGDLDNAIVIYEKEMSQ |

LpxC from *Bacteroides vulgatus* has 36% amino acid sequence identity to *E. coli* LpxC.

The amino acids located in the inhibitor-binding site are responsible for affinity. By aligning the sequences of four CHIR-090-sensitive and one insensitive LpxCs, we found out one residue in Insert II hydrophobic passage is different between these two categories. Conserved hydrophobic residues are colored in red. The amino acids of key residues in the Insert II hydrophobic passage that would influence the affinity of CHIR-090 to LpxC are colored in orange (cf. [12]).

**Table S2 taxonomic information of 102 species of bacteria.**

( see addition file “Table S2 taxonomic information of 102 species of bacteria.xlsx” )

## Supplementary Figure

Fig. S1 a

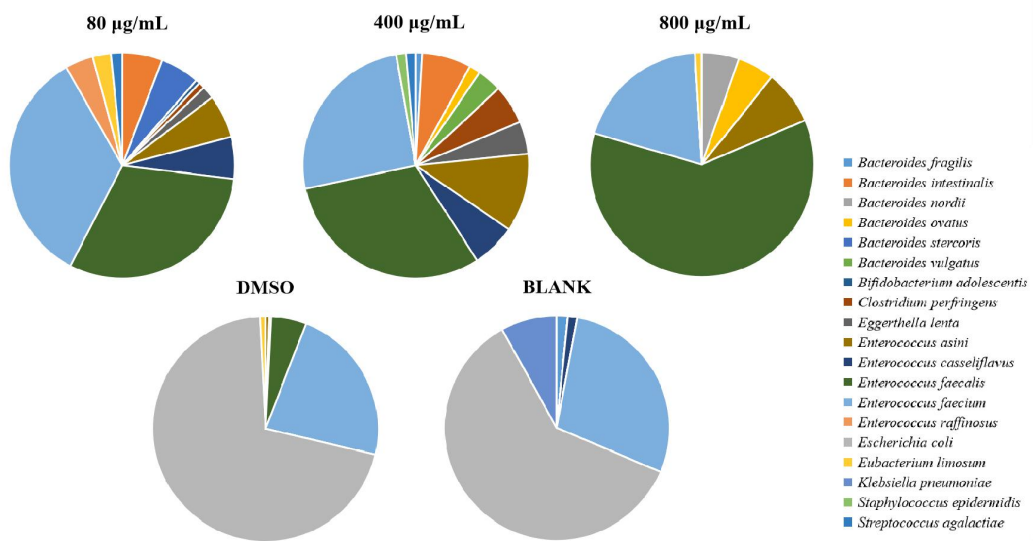

Fig. S1 b

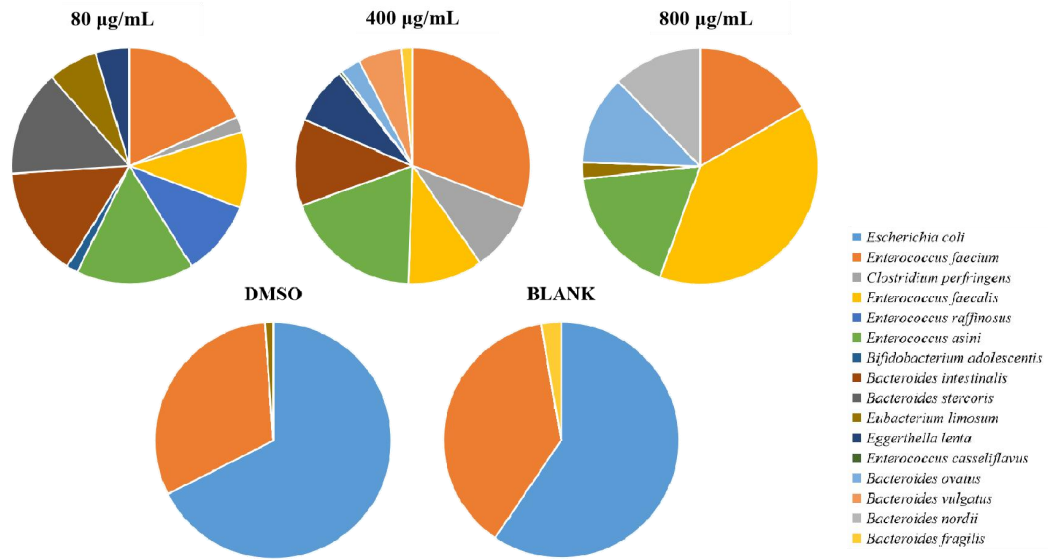

Fig. S1 c

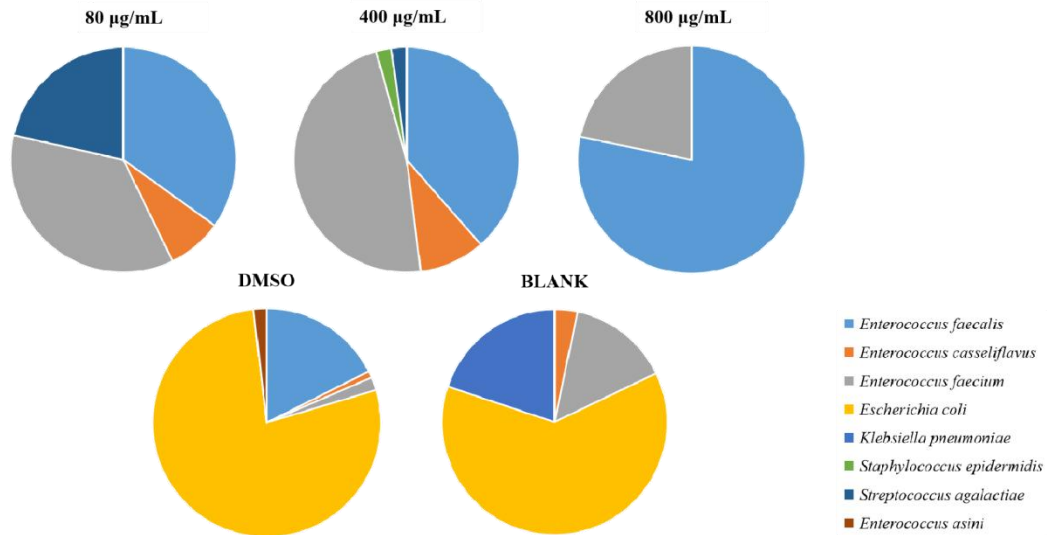

**Fig. S1 a** Percentages of colony-forming units (CFU) of bacteria of sample F1 cultured in with different concentrations of CHIR-090 under general condition (including anaerobic and aerobic concondition). In the DMSO and blank bottles (controls), *E. coli* and *Enterococcus faecium* occupied the largest percentages and only 6 and 5 species, respectively, of 19 species were isolated. In CHIR-090 bottles, *E. coli* was suppressed and the number of species increased to 12 in bottles with 80 and 400 µg/mL CHIR-090, and the species shared similar percentages. In bottles with 800

$\mu\text{g}/\text{mL}$  CHIR-090, the diversity of species was reduced to 6 of 19 species and *Enterococcus faecalis* prevailed, although *E. coli* was not found. **b** Percentages of Colony-Forming Units (CFU) of bacteria after co-cultivating suspension of F1 with different concentration of CHIR-090 in anaerobic condition. **c** in aerobic condition. *E.coli* was totally suppressed in DMSO and BLANK bottles. CHIR-090 bottles of  $80\mu\text{g}/\text{mL}$  and  $400\mu\text{g}/\text{mL}$  showed the largest diversity of bacteria species while the diversity of  $800\mu\text{g}/\text{mL}$  bottle are less.

**Fig.S2a**

|                                                 | DAY 01 | DAY 03 | DAY 06 | DAY 12 | DAY 21 | DAY 30 |
|-------------------------------------------------|--------|--------|--------|--------|--------|--------|
| <i>Fusobacterium varium</i>                     |        |        |        |        |        |        |
| <i>Escherichia coli</i>                         |        |        |        |        |        |        |
| <i>Bacteroides massiliensis</i>                 |        |        |        |        |        |        |
| <i>Klebsiella pneumoniae</i>                    |        |        |        |        |        |        |
| <i>Enterobacter amnigenus</i>                   |        |        |        |        |        |        |
| <i>Alistipes finegoldii</i>                     |        |        |        |        |        |        |
| <i>Clostridium hiraonis</i>                     |        |        |        |        |        |        |
| <i>Clostridium innocuum</i>                     |        |        |        |        |        |        |
| <i>Fusobacterium ulcerans</i>                   |        |        |        |        |        |        |
| <i>Clostridium butyricum</i>                    |        |        |        |        |        |        |
| <i>Alistipes onderdonkii</i>                    |        |        |        |        |        |        |
| <i>Acinetobacter hwoffii</i>                    |        |        |        |        |        |        |
| <i>Bacillus cereus</i>                          |        |        |        |        |        |        |
| <i>Bifidobacterium longum</i>                   |        |        |        |        |        |        |
| <i>Clostridium boltea</i>                       |        |        |        |        |        |        |
| <i>Tissierella praecuta</i>                     |        |        |        |        |        |        |
| <i>Parvimonas micra</i>                         |        |        |        |        |        |        |
| <i>Bacteroides xyloxylophilus</i>               |        |        |        |        |        |        |
| <i>Clostridium perfringens</i>                  |        |        |        |        |        |        |
| <i>Streptococcus mitis</i>                      |        |        |        |        |        |        |
| <i>Streptococcus paraanginis</i>                |        |        |        |        |        |        |
| <i>Streptococcus salivarius</i>                 |        |        |        |        |        |        |
| <i>Weissella cibaria</i>                        |        |        |        |        |        |        |
| <i>Streptococcus mutans</i>                     |        |        |        |        |        |        |
| <i>Enterococcus raffinosus</i>                  |        |        |        |        |        |        |
| <i>Enterococcus casseliflavus</i>               |        |        |        |        |        |        |
| <i>Clostridium paraputrificum</i>               |        |        |        |        |        |        |
| <i>Bacillus pumilus</i>                         |        |        |        |        |        |        |
| <i>Lactobacillus paracasei subsp. paracasei</i> |        |        |        |        |        |        |
| <i>Clostridium citroniae</i>                    |        |        |        |        |        |        |
| <i>Eggerthella lenta</i>                        |        |        |        |        |        |        |
| <i>Bacteroides vulgatus</i>                     |        |        |        |        |        |        |
| <i>Enterococcus faecium</i>                     |        |        |        |        |        |        |
| <i>Bacteroides dorei</i>                        |        |        |        |        |        |        |
| <i>Enterococcus durans</i>                      |        |        |        |        |        |        |
| <i>Enterococcus mundtii</i>                     |        |        |        |        |        |        |
| <i>Bacteroides ovatus</i>                       |        |        |        |        |        |        |
| <i>Bacteroides uniformis</i>                    |        |        |        |        |        |        |
| <i>Parabacteroides merdae</i>                   |        |        |        |        |        |        |
| <i>Enterococcus gallinarum</i>                  |        |        |        |        |        |        |
| <i>Bacteroides salyersiae</i>                   |        |        |        |        |        |        |
| <i>Clostridium bif fermentans</i>               |        |        |        |        |        |        |
| <i>Enterococcus faecalis</i>                    |        |        |        |        |        |        |
| <i>Lactococcus lactis</i>                       |        |        |        |        |        |        |
| <i>Streptococcus gallolyticus</i>               |        |        |        |        |        |        |
| <i>Bacteroides fragilis</i>                     |        |        |        |        |        |        |
| <i>Bifidobacterium adolescentis</i>             |        |        |        |        |        |        |
| <i>Bifidobacterium pseudocatenulatum</i>        |        |        |        |        |        |        |
| <i>Lactococcus lactis subsp. cremoris</i>       |        |        |        |        |        |        |
| <i>Streptococcus agalactiae</i>                 |        |        |        |        |        |        |
| <i>Bacteroides caecae</i>                       |        |        |        |        |        |        |
| <i>Bacteroides stercoris</i>                    |        |        |        |        |        |        |
| <i>Enterococcus avium</i>                       |        |        |        |        |        |        |
| <i>Bifidobacterium longum</i>                   |        |        |        |        |        |        |
| <i>Bacteroides thetaiotaomicron</i>             |        |        |        |        |        |        |
| <i>Lactococcus garvieae</i>                     |        |        |        |        |        |        |
| <i>Citrobacter amalonaticus</i>                 |        |        |        |        |        |        |
| <i>Eubacterium limosum</i>                      |        |        |        |        |        |        |
| <i>Streptococcus anginosus</i>                  |        |        |        |        |        |        |
| <i>Parabacteroides distasonis</i>               |        |        |        |        |        |        |
| <i>Enterococcus hirae</i>                       |        |        |        |        |        |        |
| <i>Bacteroides nordii</i>                       |        |        |        |        |        |        |
| <i>Enterococcus cecum</i>                       |        |        |        |        |        |        |
| <i>Parabacteroides johnsonii</i>                |        |        |        |        |        |        |
| <i>Bacteroides intestinalis</i>                 |        |        |        |        |        |        |
| <i>Butyrivibrio fibrosolvens</i>                |        |        |        |        |        |        |
| <i>Parabacteroides goldsteinii</i>              |        |        |        |        |        |        |
| <i>Alistipes shahii</i>                         |        |        |        |        |        |        |

BLANK  
CHIR090  
COMMON

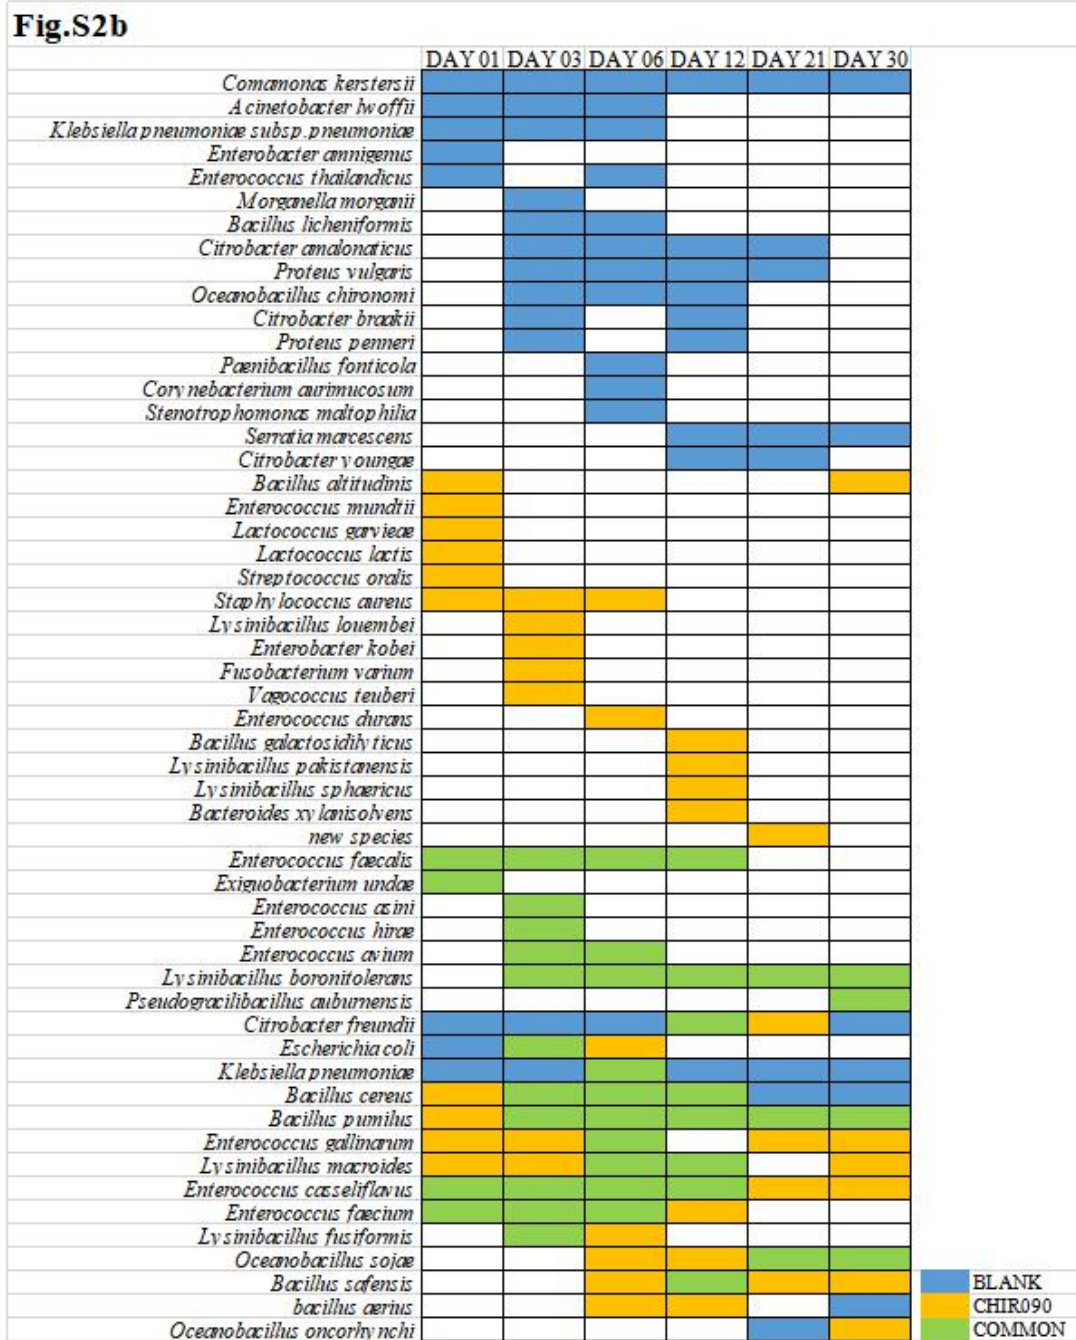

**Fig. S2 a** Distribution of all the anaerobic bacteria in 6 points in time. **b** Distribution of all the aerobic bacteria in 6 points in time. The blue color represents Blank group, the yellow represents CHIR-090 group, and the green represent existence in both bottles (COMMON group).



**Fig.S3a**

|                                          | DAY 01  | DAY 03  | DAY 06  | DAY 12  | DAY 21  | DAY 30  |
|------------------------------------------|---------|---------|---------|---------|---------|---------|
| <i>Bacteroides massiliensis</i>          | BLANK   |         |         |         |         |         |
| <i>Enterobacter amnigenus</i>            | BLANK   |         |         |         |         |         |
| <i>Enterococcus mundtii</i>              | BLANK   |         |         |         |         |         |
| <i>Enterococcus thailandicus</i>         | BLANK   |         |         |         |         |         |
| <i>Escherichia coli</i>                  | BLANK   | BLANK   | BLANK   | BLANK   |         |         |
| <i>Acinetobacter lwoffii</i>             |         | BLANK   | BLANK   |         |         |         |
| <i>Morganella morganii</i>               |         | BLANK   |         |         |         |         |
| <i>Corynebacterium carimucosum</i>       |         |         | BLANK   |         |         |         |
| <i>Klebsiella pneumoniae</i>             |         |         | BLANK   |         |         |         |
| <i>Stenotrophomonas maltophilia</i>      |         |         | BLANK   |         |         |         |
| <i>Bacillus pumilus</i>                  |         |         | BLANK   | BLANK   |         |         |
| <i>Citrobacter youngae</i>               |         |         |         | BLANK   |         |         |
| <i>Citrobacter braakii</i>               |         |         |         | BLANK   |         |         |
| <i>Bacteroides nordii</i>                |         |         |         |         |         | BLANK   |
| <i>Bacteroides sahyensis</i>             |         |         |         |         |         | BLANK   |
| <i>Parabacteroides goldsteinii</i>       |         |         |         |         |         | BLANK   |
| <i>Parabacteroides johnsonii</i>         |         |         |         |         |         | BLANK   |
| <i>Bacteroides xylosohvens</i>           | CHIR090 |         |         | CHIR090 |         |         |
| <i>Bifidobacterium pseudocatenulatum</i> | CHIR090 |         |         |         |         |         |
| <i>Streptococcus galloyticus</i>         | CHIR090 |         |         |         |         |         |
| <i>Streptococcus oralis</i>              | CHIR090 |         |         |         |         |         |
| <i>Vagococcus teuberi</i>                |         | CHIR090 |         |         |         |         |
| <i>Lactococcus garvieae</i>              |         | CHIR090 |         |         |         |         |
| <i>Enterococcus hirae</i>                |         | CHIR090 |         |         |         |         |
| <i>Enterococcus avium</i>                |         | CHIR090 | CHIR090 | CHIR090 |         |         |
| <i>Bacteroides ovatus</i>                |         | CHIR090 |         | CHIR090 |         |         |
| <i>Lysinibacillus fusiformis</i>         |         |         | CHIR090 |         |         |         |
| <i>Enterococcus raffinosus</i>           |         |         | CHIR090 | CHIR090 |         |         |
| <i>Lysinibacillus pakistanensis</i>      |         |         |         | CHIR090 |         |         |
| <i>Lysinibacillus sphaericus</i>         |         |         |         | CHIR090 |         |         |
| <i>Exiguobacterium undae</i>             | COMMON  |         |         |         |         |         |
| <i>Bacteroides fragilis</i>              | COMMON  |         |         | COMMON  |         |         |
| <i>Enterococcus casseliflavus</i>        | COMMON  | CHIR090 | CHIR090 | COMMON  |         |         |
| <i>Enterococcus faecalis</i>             | COMMON  | COMMON  | BLANK   | COMMON  |         |         |
| <i>Enterococcus faecium</i>              | COMMON  | COMMON  | COMMON  | COMMON  | COMMON  | BLANK   |
| <i>Bacteroides vulgatus</i>              | BLANK   | BLANK   | BLANK   | COMMON  |         |         |
| <i>Enterococcus durans</i>               | BLANK   | BLANK   |         | BLANK   | CHIR090 |         |
| <i>Eggertella lenta</i>                  | BLANK   |         | CHIR090 |         | CHIR090 |         |
| <i>Bacillus cereus</i>                   | CHIR090 | COMMON  | COMMON  | COMMON  |         |         |
| <i>Enterococcus cecini</i>               |         | COMMON  |         | BLANK   |         |         |
| <i>Fusobacterium varium</i>              |         | COMMON  |         |         | BLANK   | BLANK   |
| <i>Streptococcus anginosus</i>           |         | CHIR090 | COMMON  |         |         |         |
| <i>Citrobacter freundii</i>              |         | BLANK   | BLANK   | COMMON  |         |         |
| <i>Bacteroides uniformis</i>             |         |         |         | COMMON  | COMMON  | BLANK   |
| <i>Enterococcus gallinarum</i>           |         |         |         |         | COMMON  | CHIR090 |

BLANK  
CHIR090  
COMMON

**Fig.S3b**

|                                          | DAY 01  | DAY 03  | DAY 06  | DAY 12  | DAY 21  | DAY 30  |
|------------------------------------------|---------|---------|---------|---------|---------|---------|
| <i>Acinetobacter lw offii</i>            | BLANK   |         |         |         |         |         |
| <i>Bacteroides massiliensis</i>          | BLANK   |         |         |         |         |         |
| <i>Enterococcus mundtii</i>              |         |         |         |         |         |         |
| <i>Escherichia coli</i>                  | BLANK   |         |         | BLANK   |         |         |
| <i>Fusobacterium varium</i>              |         | BLANK   |         |         | BLANK   | BLANK   |
| <i>Bacillus cereus</i>                   |         |         |         | BLANK   |         |         |
| <i>Bacteroides nordii</i>                |         |         |         |         |         | BLANK   |
| <i>Bacteroides saby ersiae</i>           |         |         |         |         |         | BLANK   |
| <i>Parabacteroides goldsteinii</i>       |         |         |         |         |         | BLANK   |
| <i>Parabacteroides johnsonii</i>         |         |         |         |         |         | BLANK   |
| <i>Bacteroides fragilis</i>              | CHIR090 |         |         | CHIR090 |         |         |
| <i>Bacteroides xy lanisolvens</i>        | CHIR090 |         |         |         |         |         |
| <i>Bifidobacterium pseudocatemulatum</i> | CHIR090 |         |         |         |         |         |
| <i>Streptococcus gallolyticus</i>        | CHIR090 |         |         |         |         |         |
| <i>Enterococcus avium</i>                |         | CHIR090 | CHIR090 | CHIR090 |         |         |
| <i>Bacteroides ovatus</i>                |         | CHIR090 |         | CHIR090 |         |         |
| <i>Enterococcus raffinosus</i>           |         |         | CHIR090 | CHIR090 |         |         |
| <i>Lactococcus garvieae</i>              |         |         | CHIR090 |         |         |         |
| <i>Enterococcus casseliflavus</i>        |         |         | CHIR090 |         |         |         |
| <i>Enterococcus gallinarum</i>           |         |         |         |         |         | CHIR090 |
| <i>Enterococcus faecium</i>              | BLANK   | COMMON  | COMMON  | COMMON  | COMMON  | BLANK   |
| <i>Bacteroides vulgatus</i>              | BLANK   | BLANK   | BLANK   | COMMON  |         |         |
| <i>Enterococcus durans</i>               | BLANK   | BLANK   |         | BLANK   | CHIR090 |         |
| <i>Eggerthella lenta</i>                 | BLANK   |         | CHIR090 |         | CHIR090 |         |
| <i>Enterococcus faecalis</i>             |         | CHIR090 | COMMON  |         |         |         |
| <i>Streptococcus anginosus</i>           |         | CHIR090 | COMMON  |         |         |         |
| <i>Enterococcus asi ni</i>               |         |         | CHIR090 | BLANK   |         |         |
| <i>Bacteroides uniformis</i>             |         |         |         | COMMON  | COMMON  | BLANK   |

BLANK  
CHIR090  
COMMON

**Fig.S3c**

|                                     | DAY 01  | DAY 03  | DAY 06  | DAY 12  | DAY 21 | DAY 30 |
|-------------------------------------|---------|---------|---------|---------|--------|--------|
| <i>Enterobacter amnigenus</i>       | BLANK   |         |         |         |        |        |
| <i>Enterococcus thailandicus</i>    | BLANK   |         |         |         |        |        |
| <i>Escherichia coli</i>             | BLANK   |         |         |         |        |        |
| <i>Morganella morganii</i>          |         | BLANK   |         |         |        |        |
| <i>Acinetobacter lw offii</i>       |         | BLANK   |         |         |        |        |
| <i>Corynebacterium aurimucosum</i>  |         |         | BLANK   |         |        |        |
| <i>Klebsiella pneumoniae</i>        |         |         | BLANK   |         |        |        |
| <i>Stenotrophomonas maltophilia</i> |         |         | BLANK   |         |        |        |
| <i>Bacillus pumilus</i>             |         |         | BLANK   | BLANK   |        |        |
| <i>Citrobacter youngae</i>          |         |         |         | BLANK   |        |        |
| <i>Citrobacter braakii</i>          |         |         |         | BLANK   |        |        |
| <i>Exiguobacterium undae</i>        | CHIR090 |         |         |         |        |        |
| <i>Streptococcus oralis</i>         | CHIR090 |         |         |         |        |        |
| <i>Vagococcus teuberi</i>           |         | CHIR090 |         |         |        |        |
| <i>Enterococcus hirae</i>           |         | CHIR090 |         |         |        |        |
| <i>Fusobacterium varium</i>         |         | CHIR090 |         |         |        |        |
| <i>Lysinibacillus fusiformis</i>    |         |         | CHIR090 |         |        |        |
| <i>Bacteroides xy lanisolvens</i>   |         |         |         | CHIR090 |        |        |
| <i>Lysinibacillus pakistanensis</i> |         |         |         | CHIR090 |        |        |
| <i>Lysinibacillus sphaericus</i>    |         |         |         | CHIR090 |        |        |
| <i>Enterococcus asi ni</i>          |         | COMMON  |         |         |        |        |
| <i>Bacillus cereus</i>              | CHIR090 | COMMON  | COMMON  | COMMON  |        |        |
| <i>Enterococcus faecium</i>         | COMMON  | COMMON  | COMMON  | CHIR090 |        |        |
| <i>Enterococcus casseliflavus</i>   | COMMON  | CHIR090 | CHIR090 | COMMON  |        |        |
| <i>Enterococcus faecalis</i>        | COMMON  | BLANK   |         | COMMON  |        |        |
| <i>Citrobacter freundii</i>         |         | BLANK   | BLANK   | COMMON  |        |        |

BLANK  
CHIR090  
COMMON

**Fig.S3d**

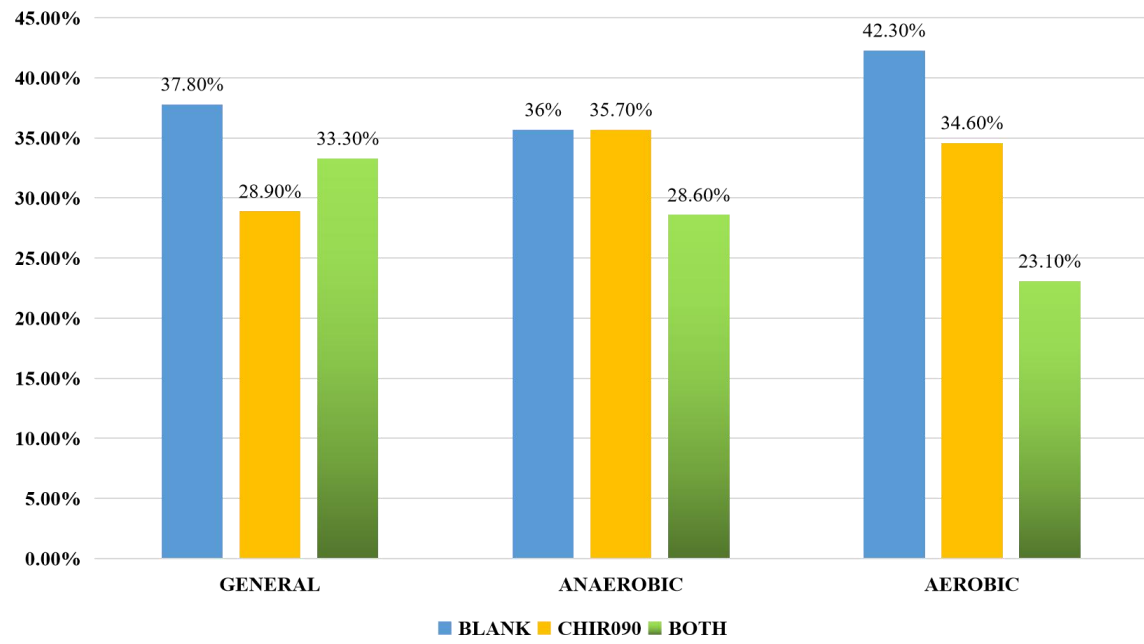

**Fig.S3e**

|                                          | DAY 01  | DAY 03  | DAY 06  | DAY 12  | DAY 21  | DAY 30  |
|------------------------------------------|---------|---------|---------|---------|---------|---------|
| <i>Exiguobacterium undae</i>             | BLANK   |         |         |         |         |         |
| <i>Escherichia coli</i>                  | BLANK   | BLANK   |         |         |         | BLANK   |
| <i>Klebsiella pneumoniae</i>             | BLANK   |         |         | BLANK   | BLANK   | BLANK   |
| <i>Fusobacterium varium</i>              | BLANK   |         | BLANK   |         | BLANK   | BLANK   |
| <i>Bacillus cereus</i>                   |         | BLANK   |         |         | BLANK   | BLANK   |
| <i>Bacteroides dorei</i>                 | BLANK   | BLANK   |         |         |         |         |
| <i>Bacteroides massiliensis</i>          | BLANK   | BLANK   |         |         |         |         |
| <i>Clostridium hiranonis</i>             | BLANK   | BLANK   |         |         |         |         |
| <i>Clostridium innocuum</i>              | BLANK   | BLANK   |         |         |         |         |
| <i>Acinetobacter hwoffii</i>             | BLANK   | BLANK   | BLANK   |         |         |         |
| <i>Enterococcus avium</i>                |         |         | BLANK   |         |         |         |
| <i>Clostridium butyricum</i>             |         |         | BLANK   |         |         |         |
| <i>Enterococcus thailandicus</i>         |         |         | BLANK   |         |         |         |
| <i>Proteus vulgaris</i>                  |         |         | BLANK   | BLANK   | BLANK   |         |
| <i>Clostridium bolteae</i>               |         |         |         |         | BLANK   |         |
| <i>Streptococcus gallolyticus</i>        |         |         |         |         | BLANK   |         |
| <i>Alistipes onderdonkii</i>             |         |         |         |         | BLANK   |         |
| <i>Oceanobacillus sojae</i>              |         |         |         |         | BLANK   | BLANK   |
| <i>Parvimonas micra</i>                  |         |         |         |         |         | BLANK   |
| <i>Oceanobacillus oncorhynchi</i>        |         |         |         |         |         | BLANK   |
| <i>Alistipes shahii</i>                  |         |         |         |         |         | BLANK   |
| <i>Bacteroides fragilis</i>              | CHIR090 | CHIR090 | CHIR090 |         |         |         |
| <i>Staphylococcus aureus</i>             | CHIR090 | CHIR090 | CHIR090 |         |         |         |
| <i>Bifidobacterium longum</i>            | CHIR090 | CHIR090 |         |         |         |         |
| <i>Bacteroides caccae</i>                | CHIR090 | CHIR090 |         |         |         |         |
| <i>Enterococcus faecalis</i>             | CHIR090 |         | CHIR090 |         | CHIR090 |         |
| <i>Bifidobacterium pseudocatenulatum</i> | CHIR090 |         |         |         |         |         |
| <i>Clostridium perfringens</i>           | CHIR090 |         |         |         |         |         |
| <i>Streptococcus agalactiae</i>          | CHIR090 |         |         |         |         |         |
| <i>Streptococcus mitis</i>               | CHIR090 |         |         |         |         |         |
| <i>Bacteroides ovatus</i>                |         | CHIR090 | CHIR090 |         |         |         |
| <i>Bacillus aerius</i>                   |         |         | CHIR090 |         |         |         |
| <i>Enterococcus casseliflavus</i>        |         |         | CHIR090 |         |         |         |
| <i>Enterococcus hirae</i>                |         |         | CHIR090 | CHIR090 | CHIR090 | CHIR090 |
| <i>Clostridium paraputrificum</i>        |         |         |         |         | CHIR090 |         |
| <i>Bacteroides thetaiotaomicron</i>      | COMMON  |         |         |         |         |         |
| <i>Lysinibacillus macroides</i>          |         |         |         |         |         | COMMON  |
| <i>Bacteroides vulgatus</i>              | BLANK   | COMMON  | COMMON  | CHIR090 | COMMON  | COMMON  |
| <i>Parabacteroides merdae</i>            | BLANK   | COMMON  |         |         |         |         |
| <i>Bacteroides stercoris</i>             | CHIR090 |         | BLANK   |         |         |         |
| <i>Eggerthella lenta</i>                 | CHIR090 |         |         | COMMON  |         |         |
| <i>Enterococcus faecium</i>              | COMMON  | CHIR090 | COMMON  | CHIR090 |         |         |
| <i>Bacillus pumilus</i>                  |         | COMMON  | CHIR090 | COMMON  |         |         |
| <i>Citrobacter amalonaticus</i>          |         | COMMON  |         | BLANK   | BLANK   |         |
| <i>Bacillus licheniformis</i>            |         | BLANK   | BLANK   | COMMON  | COMMON  | COMMON  |
| <i>Enterococcus gallinarum</i>           |         |         | BLANK   |         | CHIR090 |         |
| <i>Bacillus safensis</i>                 |         |         | CHIR090 | COMMON  | CHIR090 | COMMON  |
| <i>Bacteroides uniformis</i>             |         |         |         |         | CHIR090 | COMMON  |
| <i>Parabacteroides distasonis</i>        |         |         |         | CHIR090 |         | COMMON  |

BLANK  
CHIR090  
COMMON



**Fig.S3f**

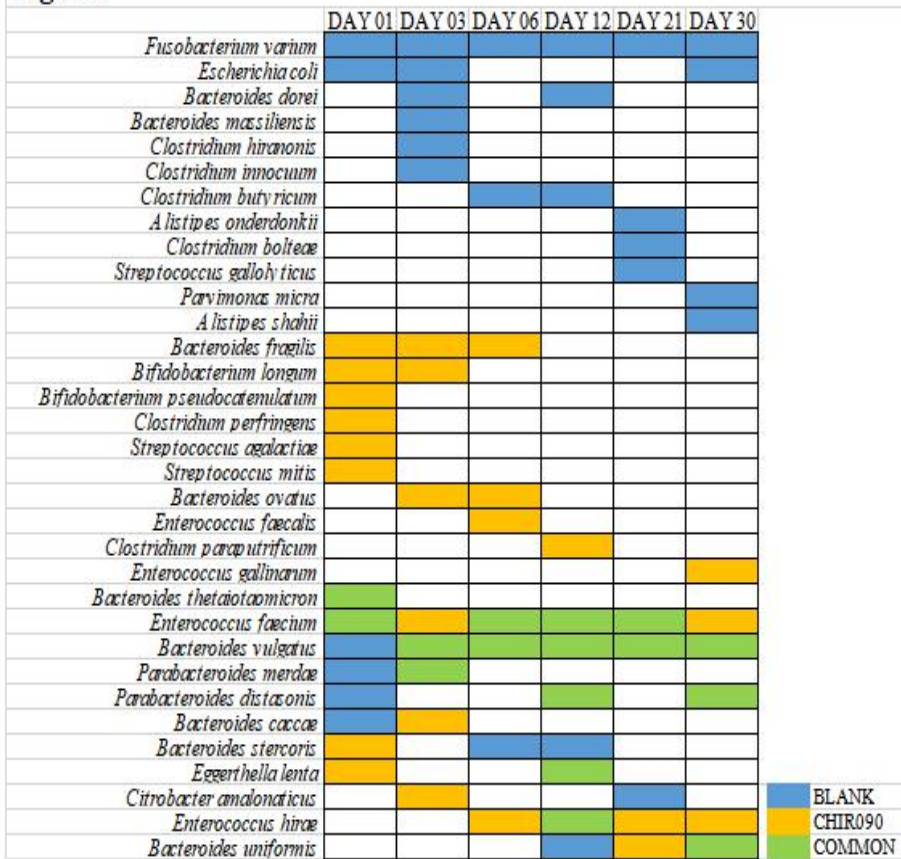

**Fig.S3g**

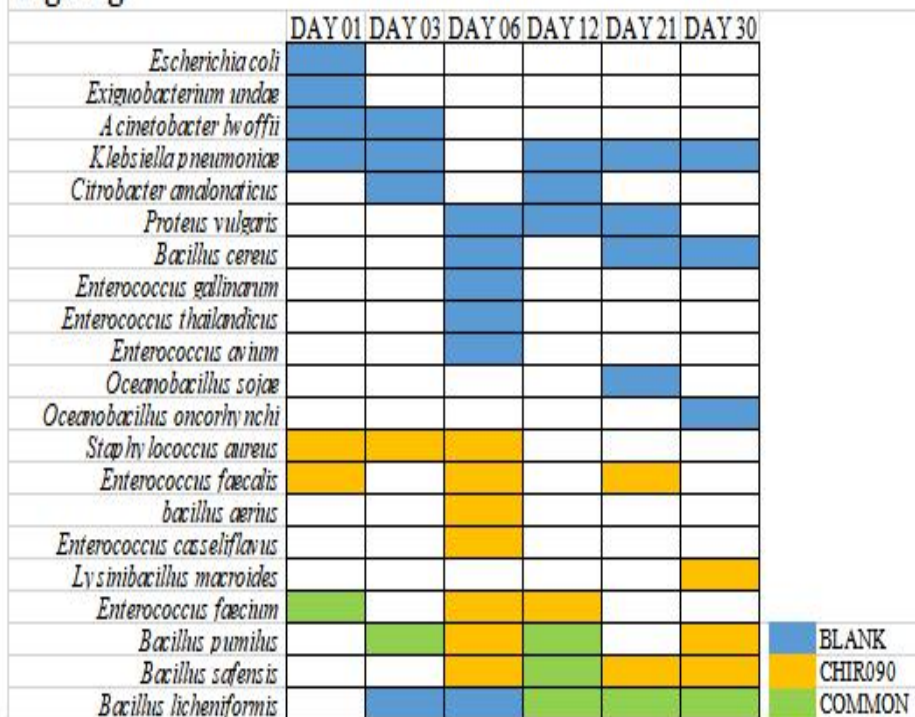

**Fig. S3h**

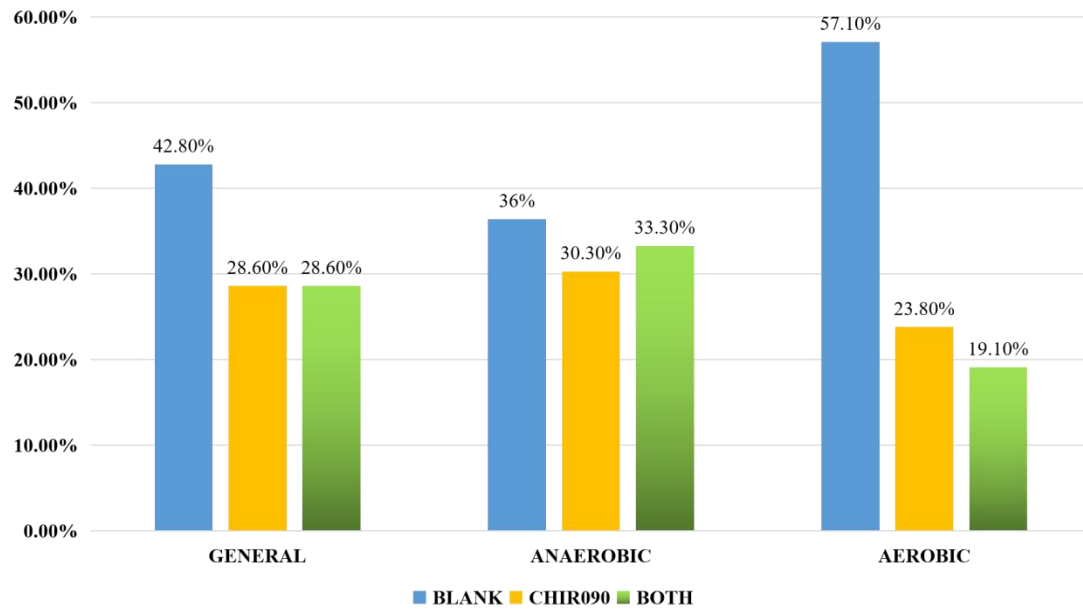

**Fig.S3i**

|                                                        | DAY 01  | DAY 03  | DAY 06  | DAY 12  | DAY 21  | DAY 30  |
|--------------------------------------------------------|---------|---------|---------|---------|---------|---------|
| <i>Bacillus cereus</i>                                 | BLANK   |         |         |         |         |         |
| <i>Enterobacter amnigenus</i>                          | BLANK   |         |         |         |         |         |
| <i>Exiguobacterium undae</i>                           | BLANK   |         |         |         |         |         |
| <i>Bifidobacterium pseudocatenulatum</i>               |         | BLANK   |         |         |         |         |
| <i>Fusobacterium ulcerans</i>                          |         | BLANK   |         | BLANK   |         |         |
| <i>Proteus penneri</i>                                 |         | BLANK   |         | BLANK   |         |         |
| <i>Proteus vulgaris</i>                                |         | BLANK   |         | BLANK   | BLANK   |         |
| <i>Bacillus cereus</i>                                 |         |         |         | BLANK   | BLANK   |         |
| <i>Citrobacter amalonaticus</i>                        |         |         | BLANK   |         | BLANK   |         |
| <i>Enterococcus faecalis</i>                           | CHIR090 | CHIR090 | CHIR090 |         | CHIR090 |         |
| <i>Bacteroides xyloxylophilus</i>                      |         | CHIR090 |         |         |         |         |
| <i>Clostridium citroniae</i>                           |         | CHIR090 |         |         |         |         |
| <i>Clostridium perfringens</i>                         |         | CHIR090 |         |         |         |         |
| <i>Enterobacter kobei</i>                              |         | CHIR090 |         |         |         |         |
| <i>Enterococcus hirae</i>                              |         |         | CHIR090 |         |         |         |
| <i>Bacteroides stercoris</i>                           |         |         | CHIR090 |         |         | CHIR090 |
| <i>Bacteroides uniformis</i>                           |         |         |         |         | CHIR090 |         |
| <i>Bacillus pumilus</i>                                |         |         |         |         | CHIR090 |         |
| <i>Bacteroides dorei</i>                               |         |         |         |         | CHIR090 |         |
| <i>Lactobacillus paracasei</i> subsp. <i>paracasei</i> |         |         |         |         |         | CHIR090 |
| <i>Lactococcus garvieae</i>                            | COMMON  |         |         |         |         |         |
| <i>Escherichia coli</i>                                |         | COMMON  | COMMON  |         |         |         |
| <i>Eggerthella lenta</i>                               | BLANK   | COMMON  | COMMON  | CHIR090 | COMMON  | BLANK   |
| <i>Enterococcus durans</i>                             | BLANK   |         | CHIR090 | BLANK   | BLANK   |         |
| <i>Klebsiella pneumoniae</i>                           | BLANK   |         | COMMON  |         |         |         |
| <i>Klebsiella pneumoniae</i> subsp. <i>pneumoniae</i>  | BLANK   |         | CHIR090 |         |         |         |
| <i>Bacteroides fragilis</i>                            | CHIR090 | COMMON  | CHIR090 |         |         |         |
| <i>Bacteroides stercoris</i>                           | CHIR090 | CHIR090 | BLANK   | CHIR090 |         | BLANK   |
| <i>Enterococcus faecium</i>                            | CHIR090 |         | COMMON  |         | BLANK   |         |
| <i>Enterococcus gallinarum</i>                         | COMMON  | CHIR090 | COMMON  | COMMON  |         |         |
| <i>Enterococcus avium</i>                              | COMMON  | BLANK   | COMMON  | COMMON  | CHIR090 | COMMON  |
| <i>Bacillus licheniformis</i>                          |         | BLANK   | BLANK   | COMMON  | COMMON  | COMMON  |
| <i>Enterococcus casseliflavus</i>                      |         | BLANK   |         | CHIR090 | CHIR090 | CHIR090 |
| <i>Parabacteroides distasonis</i>                      |         | BLANK   |         |         | COMMON  |         |
| <i>Bacteroides ovatus</i>                              |         | COMMON  |         |         | BLANK   |         |
| <i>Bacteroides vulgatus</i>                            |         |         | BLANK   | BLANK   |         | COMMON  |

BLANK  
CHIR090  
COMMON

**Fig.S3j**

|                                                 | DAY 01  | DAY 03  | DAY 06  | DAY 12  | DAY 21  | DAY 30  |
|-------------------------------------------------|---------|---------|---------|---------|---------|---------|
| <i>Enterococcus durans</i>                      | BLANK   |         |         | BLANK   | BLANK   |         |
| <i>Enterobacter amnigenus</i>                   | BLANK   |         |         |         |         |         |
| <i>Klebsiella pneumoniae</i>                    | BLANK   |         |         |         |         |         |
| <i>Escherichia coli</i>                         | BLANK   |         |         |         |         |         |
| <i>Bifidobacterium pseudocatenulatum</i>        |         | BLANK   |         |         |         |         |
| <i>Fusobacterium ulcerans</i>                   |         | BLANK   |         | BLANK   |         |         |
| <i>Enterococcus faecium</i>                     |         |         | BLANK   |         | BLANK   |         |
| <i>Enterococcus faecalis</i>                    | CHIR090 | CHIR090 | CHIR090 | CHIR090 | CHIR090 | CHIR090 |
| <i>Bacteroides xylosovens</i>                   |         | CHIR090 |         |         |         |         |
| <i>Clostridium citroniae</i>                    |         | CHIR090 |         |         |         |         |
| <i>Clostridium perfringens</i>                  |         | CHIR090 |         |         |         |         |
| <i>Enterococcus hirae</i>                       |         |         | CHIR090 |         |         |         |
| <i>Bacteroides sabyersiae</i>                   |         |         | CHIR090 |         |         | CHIR090 |
| <i>Enterococcus casseliflavus</i>               |         |         |         | CHIR090 | CHIR090 |         |
| <i>Bacteroides uniformis</i>                    |         |         |         |         | CHIR090 |         |
| <i>Bacillus pumilus</i>                         |         |         |         |         | CHIR090 |         |
| <i>Bacteroides dorei</i>                        |         |         |         |         | CHIR090 |         |
| <i>Lactobacillus paracasei subsp. paracasei</i> |         |         |         |         |         | CHIR090 |
| <i>Lactococcus garvieae</i>                     | COMMON  |         |         |         |         |         |
| <i>Enterococcus avium</i>                       | COMMON  | CHIR090 | COMMON  | COMMON  | CHIR090 | COMMON  |
| <i>Enterococcus gallinarum</i>                  | BLANK   |         | BLANK   | COMMON  | CHIR090 | COMMON  |
| <i>Eggerthella lenta</i>                        | BLANK   | COMMON  | COMMON  | CHIR090 | COMMON  | BLANK   |
| <i>Bacteroides stercoris</i>                    | CHIR090 | COMMON  | COMMON  | CHIR090 |         | COMMON  |
| <i>Bacteroides fragilis</i>                     | CHIR090 | COMMON  | CHIR090 |         |         |         |
| <i>Bacteroides ovatus</i>                       |         | COMMON  |         |         | BLANK   |         |
| <i>Parabacteroides distaxonis</i>               |         |         | CHIR090 |         | COMMON  | BLANK   |
| <i>Bacteroides vulgatus</i>                     |         |         | BLANK   | BLANK   |         | COMMON  |

**Fig.S3k**

|                                                | DAY 01  | DAY 03  | DAY 06  | DAY 12  | DAY 21  | DAY 30  |
|------------------------------------------------|---------|---------|---------|---------|---------|---------|
| <i>Exiguobacterium undae</i>                   | BLANK   |         |         |         |         |         |
| <i>Proteus perreri</i>                         |         | BLANK   |         | BLANK   |         |         |
| <i>Proteus vulgaris</i>                        |         | BLANK   |         | BLANK   | BLANK   |         |
| <i>Citrobacter amalonaticus</i>                |         |         | BLANK   |         | BLANK   |         |
| <i>Bacillus cereus</i>                         |         |         |         | BLANK   | BLANK   |         |
| <i>Bacillus aerius</i>                         |         |         |         |         |         | BLANK   |
| <i>Enterococcus faecium</i>                    | CHIR090 |         | CHIR090 |         |         |         |
| <i>Enterococcus gallinarum</i>                 | CHIR090 | CHIR090 | CHIR090 |         | CHIR090 | CHIR090 |
| <i>Enterococcus faecalis</i>                   | CHIR090 | CHIR090 |         |         |         |         |
| <i>Enterobacter kobei</i>                      |         | CHIR090 |         |         |         |         |
| <i>Enterococcus durans</i>                     |         |         | CHIR090 |         |         |         |
| <i>Enterococcus avium</i>                      |         |         | CHIR090 |         |         |         |
| <i>Klebsiella pneumoniae subsp. pneumoniae</i> | BLANK   |         | CHIR090 |         |         |         |
| <i>Escherichia coli</i>                        | BLANK   |         |         |         |         | CHIR090 |
| <i>Klebsiella pneumoniae</i>                   | BLANK   | BLANK   | COMMON  |         |         |         |
| <i>Bacillus licheniformis</i>                  |         | BLANK   | BLANK   | COMMON  | COMMON  | COMMON  |
| <i>Enterococcus casseliflavus</i>              |         |         | BLANK   | CHIR090 | CHIR090 | CHIR090 |



**Fig. S31**

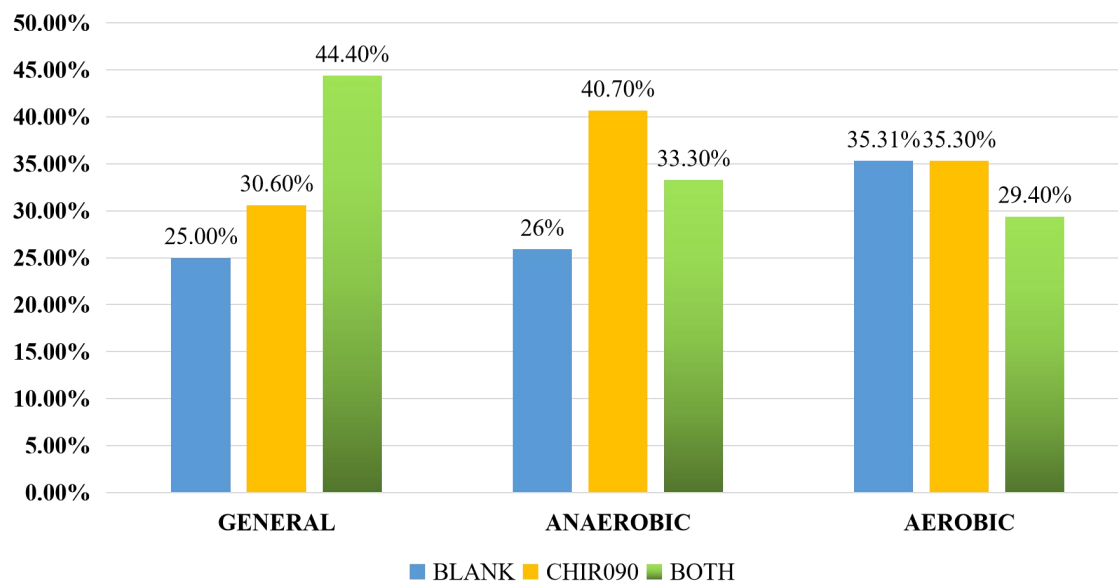

**Fig.S3m**

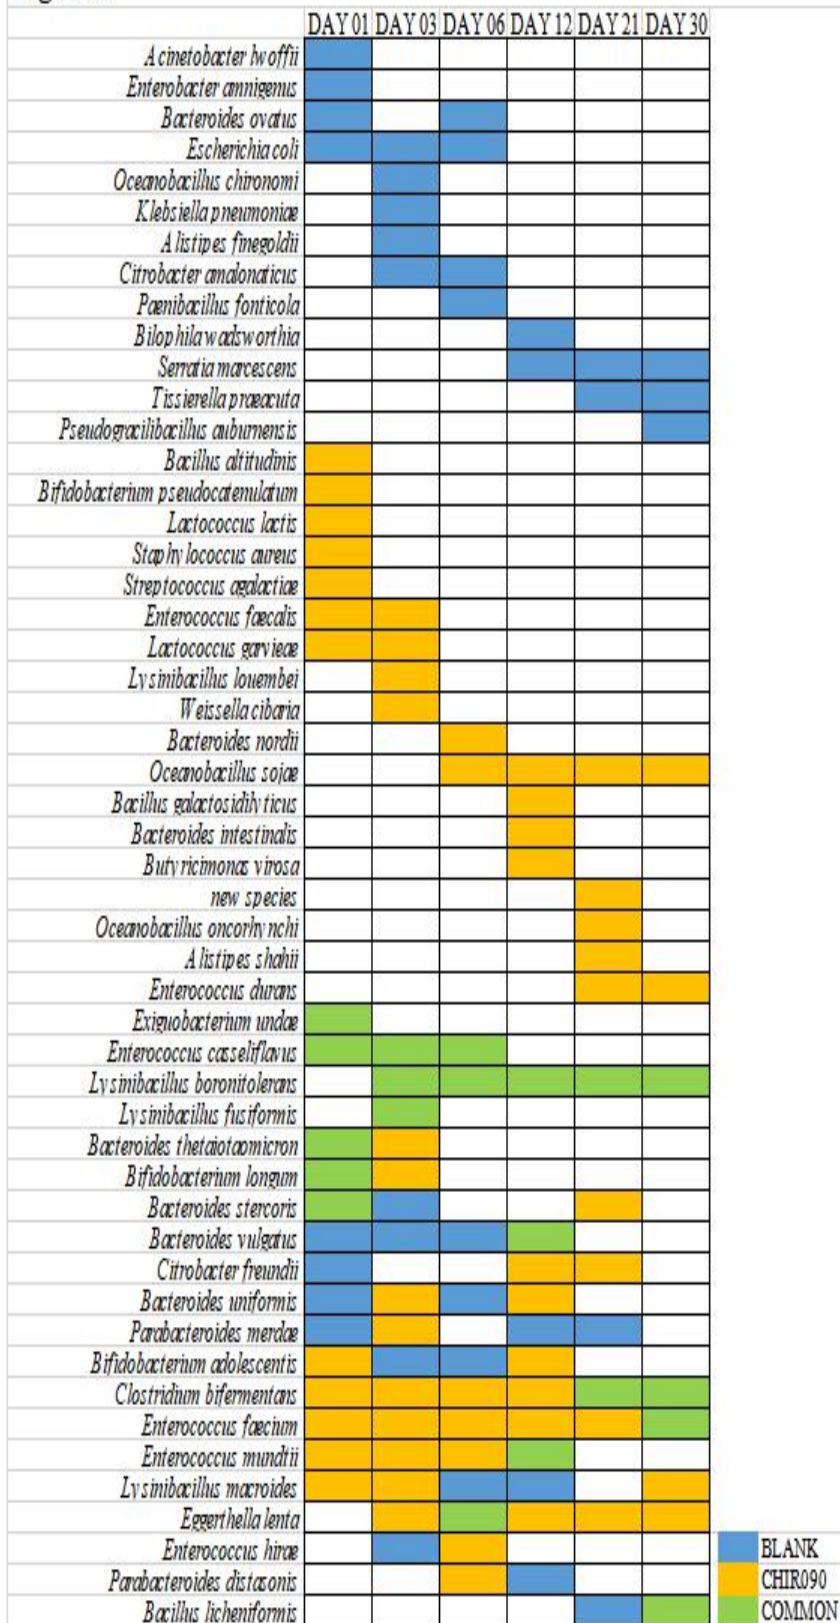

BLANK  
CHIR090  
COMMON

**Fig.S3n**

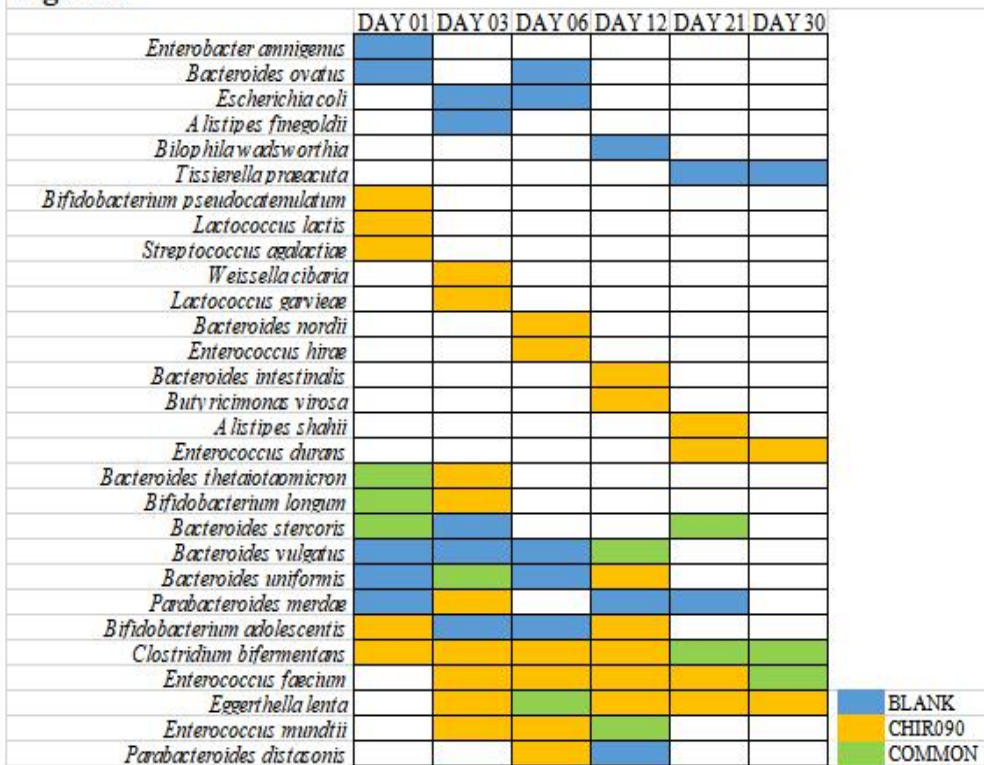

**Fig.S3o**

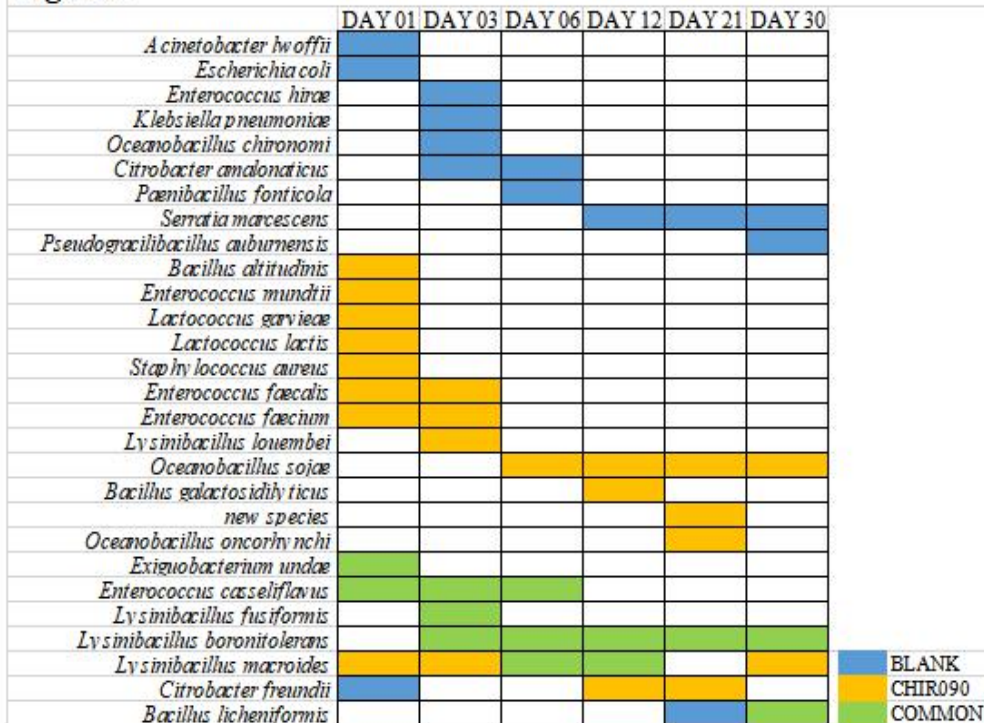

**Fig. S3p**

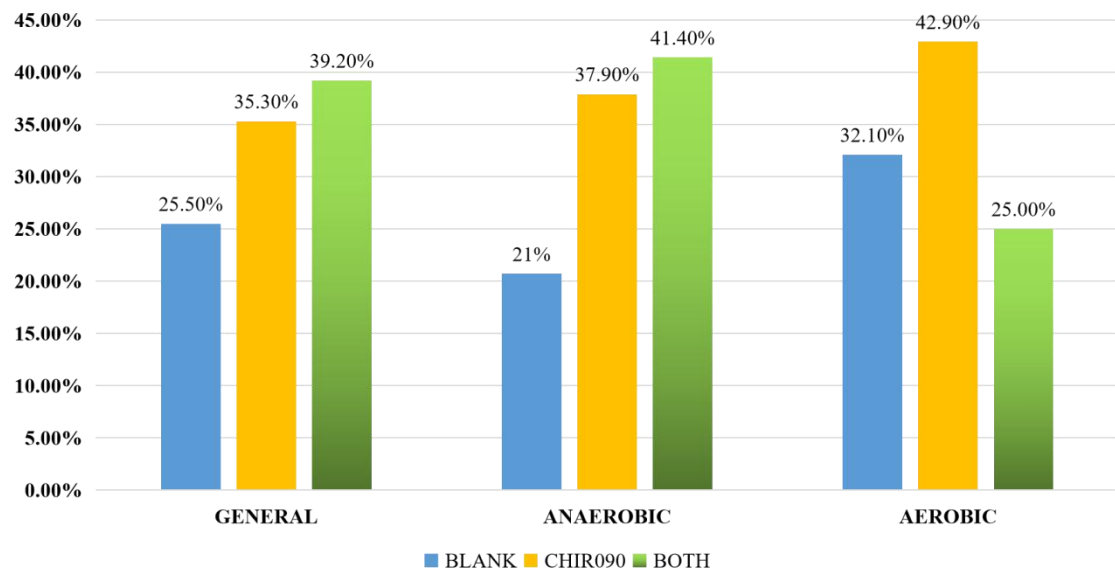

Fig.S3q

|                                                | DAY 01  | DAY 03  | DAY 06  | DAY 12  | DAY 21  | DAY 30  |
|------------------------------------------------|---------|---------|---------|---------|---------|---------|
| <i>Enterobacter amnigenus</i>                  | BLANK   |         |         |         |         |         |
| <i>Exiguobacterium undae</i>                   | BLANK   |         |         |         |         |         |
| <i>Parabacteroides merdae</i>                  | BLANK   |         |         |         |         |         |
| <i>Acinetobacter lwoffii</i>                   | BLANK   | BLANK   |         |         |         |         |
| <i>Bacteroides dorei</i>                       | BLANK   | BLANK   |         |         |         |         |
| <i>Escherichia coli</i>                        | BLANK   |         | BLANK   |         |         |         |
| <i>Comamonas kerstersii</i>                    | BLANK   |         | BLANK   | BLANK   | BLANK   | BLANK   |
| <i>Bifidobacterium longum</i>                  | BLANK   | BLANK   |         |         |         |         |
| <i>Citrobacter braakii</i>                     | BLANK   | BLANK   |         |         |         |         |
| <i>Klebsiella pneumoniae subsp. pneumoniae</i> | BLANK   | BLANK   |         |         |         |         |
| <i>Klebsiella pneumoniae</i>                   | BLANK   | BLANK   |         | BLANK   | BLANK   | BLANK   |
| <i>Bacillus licheniformis</i>                  | BLANK   |         | BLANK   | BLANK   | BLANK   | BLANK   |
| <i>Alistipes onderdonkii</i>                   | BLANK   |         | BLANK   |         |         |         |
| <i>Oceanobacillus chironomi</i>                | BLANK   |         | BLANK   | BLANK   |         |         |
| <i>Butyrivibrio virosa</i>                     | BLANK   |         |         | BLANK   |         |         |
| <i>Citrobacter youngae</i>                     | BLANK   |         |         |         | BLANK   |         |
| <i>Citrobacter freundii</i>                    | BLANK   |         |         |         |         | BLANK   |
| <i>Clostridium boltae</i>                      | BLANK   |         |         |         |         | BLANK   |
| <i>Bacteroides caecae</i>                      | CHIR090 |         |         |         |         |         |
| <i>Clostridium perfringens</i>                 | CHIR090 |         |         |         |         |         |
| <i>Enterococcus avium</i>                      | CHIR090 |         |         |         |         |         |
| <i>Lactococcus lactis subsp. cremoris</i>      | CHIR090 |         |         |         |         |         |
| <i>Streptococcus paraanguinis</i>              | CHIR090 |         |         |         |         |         |
| <i>Streptococcus salivarius</i>                | CHIR090 |         |         |         |         |         |
| <i>Lactococcus lactis</i>                      | CHIR090 | CHIR090 |         |         |         |         |
| <i>Staphylococcus aureus</i>                   | CHIR090 | CHIR090 |         |         |         |         |
| <i>Streptococcus gallolyticus</i>              | CHIR090 | CHIR090 |         |         |         |         |
| <i>Lactococcus garvieae</i>                    | CHIR090 | CHIR090 |         |         |         |         |
| <i>Streptococcus mutans</i>                    | CHIR090 |         | CHIR090 |         |         |         |
| <i>Bacillus cereus</i>                         | CHIR090 |         |         | CHIR090 |         |         |
| <i>Parabacteroides goldsteinii</i>             | CHIR090 |         |         |         | CHIR090 |         |
| <i>Bacillus altitudinis</i>                    | CHIR090 |         |         |         |         | CHIR090 |
| <i>Bacteroides sabyersiae</i>                  | BLANK   |         |         | CHIR090 |         |         |
| <i>Enterococcus casseliflavus</i>              | BLANK   | CHIR090 | COMMON  | CHIR090 |         | CHIR090 |
| <i>Bacillus pumilus</i>                        | CHIR090 | COMMON  | CHIR090 | CHIR090 | CHIR090 | CHIR090 |
| <i>Bacteroides vulgatus</i>                    | CHIR090 | COMMON  | BLANK   | BLANK   | BLANK   |         |
| <i>Enterococcus faecalis</i>                   | COMMON  | CHIR090 | COMMON  |         |         |         |
| <i>Eggerthella lenta</i>                       | COMMON  | CHIR090 | CHIR090 | CHIR090 | CHIR090 | COMMON  |
| <i>Enterococcus faecium</i>                    | COMMON  | CHIR090 | COMMON  | COMMON  | COMMON  | COMMON  |
| <i>Eubacterium limosum</i>                     | COMMON  | CHIR090 | CHIR090 | CHIR090 | CHIR090 | COMMON  |
| <i>Bacteroides uniformis</i>                   | BLANK   | BLANK   |         | CHIR090 |         | CHIR090 |
| <i>Bacteroides stercoris</i>                   | BLANK   | BLANK   |         |         | CHIR090 |         |
| <i>Bacteroides ovatus</i>                      | BLANK   |         | BLANK   |         |         | CHIR090 |
| <i>Parabacteroides distasonis</i>              | BLANK   |         | COMMON  | CHIR090 | COMMON  | BLANK   |
| <i>Bacteroides intestinalis</i>                | BLANK   |         |         | CHIR090 |         | BLANK   |
| <i>Parabacteroides johnsonii</i>               | BLANK   |         |         | BLANK   | COMMON  |         |

BLANK  
CHIR090  
COMMON



**Fig.S3r**

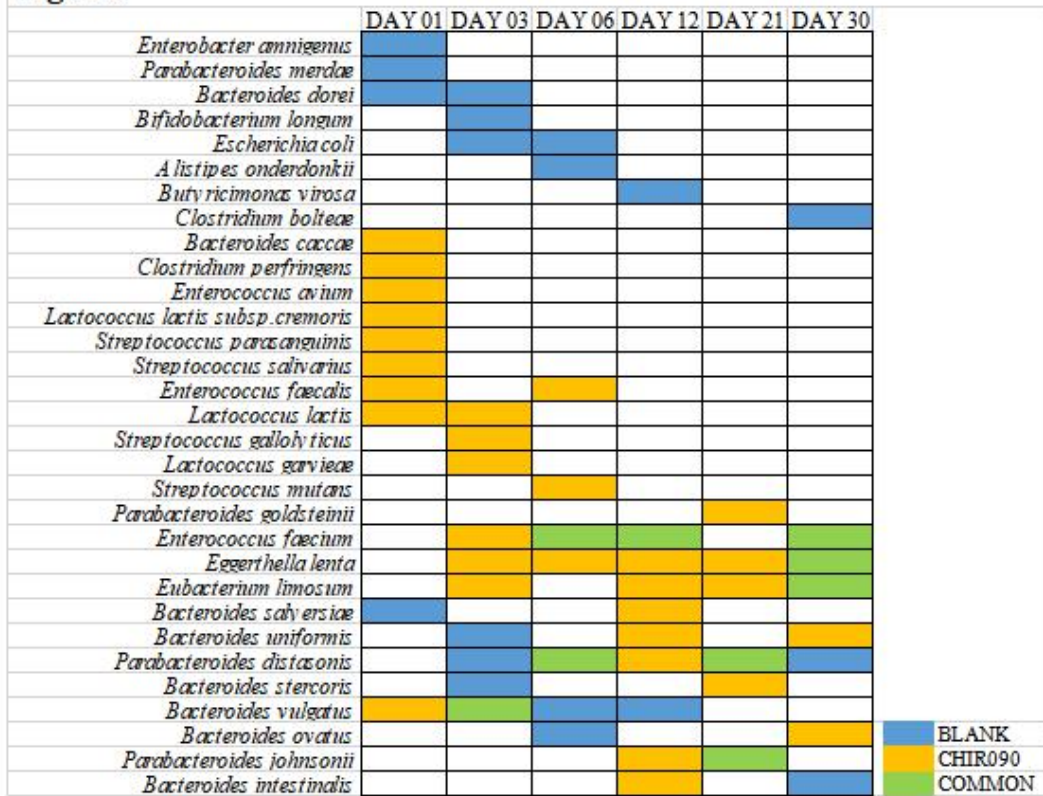

**Fig.S3s**

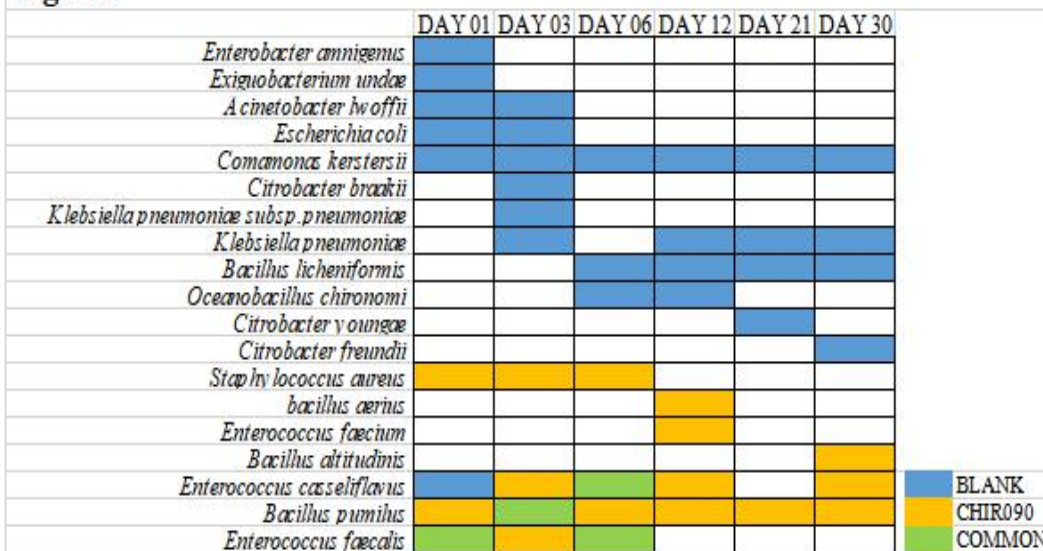

**Fig. S3t**

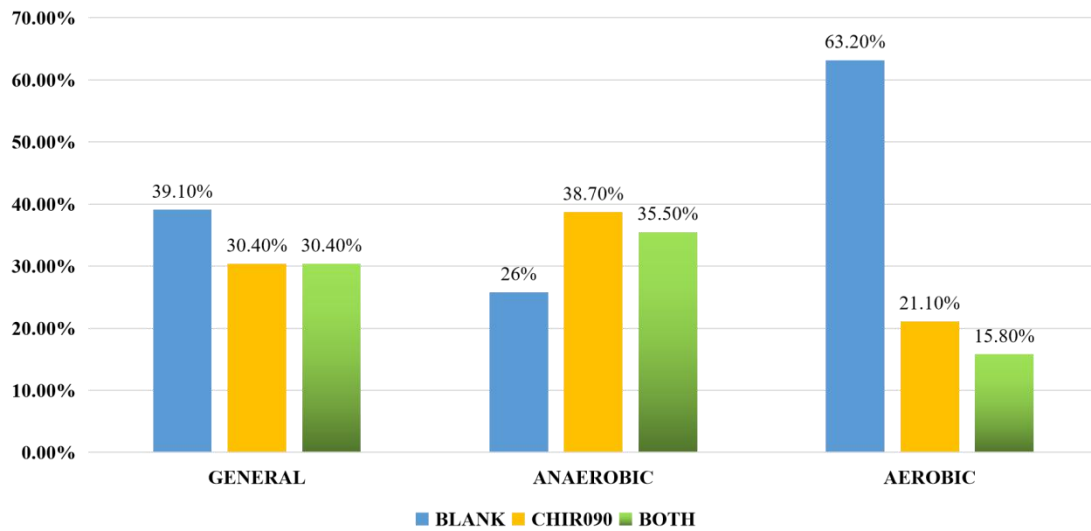

**Fig. S3a** The ditrubution of **F2** bacteria at 6 points in time in the general condition. **b** In anaerobic condition. **c** In aerobic condition. **d** The percentage of bacteria existed both/ respectively in BLANK, CHIR090 group in general, anaerobic and aerobic condition. **e** The ditrubution of **F3** bacteria at 6 points in time in the general condition. **f** In anaerobic condition. **g** In aerobic condition. **h** The percentage of bacteria existed both/ respectively in BLANK, CHIR090 group in general, anaerobic and aerobic condition. **i** The ditrubution of **F4** bacteria at 6 points in time in the general condition. **j** In anaerobic condition. **k** In aerobic condition. **l** The percentage of bacteria existed both/ respectively in BLANK, CHIR090 group in general, anaerobic and aerobic condition. **m** The ditrubution of **F5** bacteria at 6 points in time in the general condition. **n** In anaerobic condition. **o** In aerobic condition. **p** The percentage of bacteria existed both/ respectively in BLANK, CHIR090 group in general, anaerobic and aerobic condition. **q** The ditrubution of **F6** bacteria at 6 points in time in the general condition. **r** In anaerobic condition. **s** In aerobic condition. **t** The percentage

of bacteria existed both/ respectively in BLANK, CHIR090 group in general, anaerobic and aerobic condition. The blue color represents Blank group, the yellow represents CHIR-090 group, and the green represent existence in both bottles (COMMON group).
